1 **Detection of obstetric anal sphincter injuries using machine learning-assisted**  
2 **impedance spectroscopy: a prospective, comparative, multicentre clinical**  
3 **study**

4  
5 Katarzyna Borycka<sup>1,2</sup>, Marcel Młyńczak<sup>1,3</sup>, Maciej Rosol<sup>1,3</sup>, Kacper Korzeniewski<sup>1,3</sup>,  
6 Piotr Iwanowski<sup>1</sup>, Hynek Heřman<sup>4,5</sup>, Petr Janku<sup>6,7</sup>, Małgorzata Uchman-Musielak<sup>8</sup>,  
7 Erik Dosedla<sup>9</sup>, Enrique Gonzalez Diaz<sup>10</sup>, Iwona Sudoł-Szopińska<sup>11,12</sup>, Michał Mik<sup>13</sup>,  
8 Carlo Ratto<sup>14</sup>, Antonino Spinelli<sup>15,16</sup>

9  
10 <sup>1</sup> OASIS Diagnostics, R&D of Medical Technology, Warsaw, Poland

11 <sup>2</sup> Centre of Postgraduate Medical Education, Warsaw, Poland

12 <sup>3</sup> Warsaw University of Technology, Faculty of Mechatronics, Institute of Metrology and  
13 Biomedical Engineering, Warsaw, Poland

14 <sup>4</sup> Institute for the Care of Mother and Child, Prague, Czech Republic

15 <sup>5</sup> 3rd Medical Faculty, Charles University, Prague, Czech Republic

16 <sup>6</sup> Department of Obstetrics and Gynaecology, University Hospital Brno and Medical Faculty,  
17 Masaryk University, Brno, Czech Republic

18 <sup>7</sup> Department of Health Sciences, Medical Faculty, Masaryk University, Brno, Czech Republic

19 <sup>8</sup> Department of Obstetrics and Gynaecology, Solec Hospital, Warsaw, Poland

20 <sup>9</sup> Department of Gynaecology and Obstetrics, Faculty of Medicine, Univerzita Pavla Jozefa  
21 Šafárika, Košice, Slovakia

22 <sup>10</sup> Department of Obstetrics and Gynaecology, Complejo Asistencial Universitario de Leon,  
23 Spain

24 <sup>11</sup> Department of Radiology, National Institute of Geriatrics, Rheumatology and Rehabilitation,  
25 Warsaw, Poland

26 <sup>12</sup> Ultrasound Department, Warsaw Medical University, Poland

27 <sup>13</sup> Department of General and Colorectal Surgery, Medical University of Lodz, Poland

28 <sup>14</sup> Proctology and Pelvic Floor Surgery Unit, Isola Tiberina Hospital, Gemelli Isola, Catholic  
29 University, Rome, Italy

30 <sup>15</sup> Department of Biomedical Sciences, Humanitas University, Via Rita Levi Montalcini 4, 20072  
31 Pieve Emanuele, Milan, Italy

32 <sup>16</sup> IRCCS Humanitas Research Hospital, via Manzoni 56, 20089 Rozzano, Milan, Italy

33  
34  
35 **Short Title**

36 Detection of OASI using machine learning-assisted impedance spectroscopy

37  
38  
39 **Abstract**

40  
41 **Objective:** To evaluate the clinical performance and safety of the ONIRY system for  
42 obstetric anal sphincter injuries (OASI) detection versus three-dimensional endoanal  
43 ultrasound (EAUS).

44 **Design:** A prospective, comparative, multicentre, international study.

45 **Setting:** Poland, Czechia, Slovakia, and Spain.

46 Population: 152 women between the first moments up to 8 weeks after vaginal  
47 delivery.

48 Methods: Participants underwent EAUS and were allocated to groups based on  
49 OASIS classification: A (no perineal tear), B (1st or 2nd degree tear), or C (3rd or 4th  
50 degree, anal sphincters affected). Electric impedance was measured in the anal  
51 canal using the ONIRY system. The primary endpoint was the diagnostic outcome of  
52 impedance spectroscopy versus EAUS. Adverse events were collected. Part II  
53 involved in silico modelling and 10-time 10-fold cross-validation for automated  
54 analysis.

55 Main Outcome Measures: Accuracy, sensitivity, and specificity.

56 Results: 30 women were allocated to group A, 61 to group B, and 61 to group C. The  
57 diagnostic outcome was determined for 147 participants. The accuracy, sensitivity,  
58 and specificity of the ML-assisted impedance spectroscopy were  $87.0 \pm 0.5\%$ ,  $90.6 \pm$   
59  $2.0\%$ , and  $84.6 \pm 1.9\%$ , respectively, compared with EAUS. After data cleaning, the  
60 performance metrics of the proposed final ML model for ONIRY were:  $90.0 \pm 0.4\%$ ,  
61  $90.0 \pm 1.2\%$ , and  $90.0 \pm 0.7\%$ , respectively. No adverse device effects or deficiencies  
62 were observed.

63 Conclusion: The ML-assisted impedance spectroscopy appears to be a high-  
64 performance and safe method for rapid OASI detection, complementing digital rectal  
65 examination in obstetric settings.

66 Funding: The study was financed by the Polish National Centre for Research and  
67 Development (POIR.01.01.01-00-0726/18).

68

69

## 70 **Keywords**

71 obstetric anal sphincter injury (OASI), anal sphincter, perineal tear, faecal  
72 incontinence, rapid diagnostics, clinical study, impedance spectroscopy, machine  
73 learning

74

## 75 1. Introduction

76

77 Obstetric anal sphincter injuries (OASIs) represent a frequent complication of vaginal  
78 delivery, directly implicated in various degrees of continence impairment or frank  
79 faecal incontinence (FI). It is estimated that every fourth woman having given vaginal  
80 delivery suffers from some level of OASI<sup>1-9</sup>, translating to a 50-60% risk of developing  
81 FI either immediately following delivery<sup>10</sup> or later in her life<sup>11-12</sup>. FI has been reported  
82 to have a destructive impact on women's quality of life, affecting their social  
83 interactions, professional activities, family dynamics, and intimate relationships<sup>13-14</sup>.

84 There is still not acceptably available diagnostic and screening tool worldwide for  
85 detection of OASI in the early postpartum period. So far, obstetricians must consider  
86 this challenging diagnosis by performing the digital rectal examination as the only  
87 available diagnostic option in practice as a rule. This can be though troublesome,  
88 especially for inexperienced obstetricians and midwives. This is why the rate of  
89 primarily undetected OASIs still reaches as much as 80%<sup>15-17</sup>.

90 The relatively high prevalence of FI observed in women with undetected OASI  
91 following vaginal delivery<sup>12,18-19</sup> prompts clinicians to revise the algorithms of obstetric  
92 care. Still, the gold standard for advanced diagnostics of anal sphincters lesions is  
93 the endoanal ultrasound (EAUS), a well-established and well tolerated technique with  
94 almost 100% sensitivity in identifying structural abnormalities of the anal sphincters<sup>20</sup>.  
95 As found out in a Cochrane Library review, the use of EAUS prior to obstetric  
96 perineal repair is associated with a reduction in the rate of severe FI at 6 months<sup>21</sup>.  
97 However, EAUS is of limited availability at maternity care facilities, which, admittedly,  
98 may be further confined by the lack of experienced diagnosticians available there<sup>22</sup>.  
99 As the interpretation of the EAUS imaging requires expertise, its actual performance  
100 does not reach 100% so a proportion of women is misdiagnosed with OASI even with  
101 the use of this method<sup>12,23-24</sup>.

102 Several studies on transperineal ultrasound (TPUS) have been reported over the last  
103 decade as a variation of ultrasound imaging of the anal sphincter that demonstrate a  
104 good correlation with EAUS results for the diagnosis of OASI<sup>25-27</sup>. A study in which  
105 TPUS was performed immediately after delivery and prior to sphincter suturing (if  
106 OASI detected) showed that more OASIs were identified on TPUS compared with  
107 digital rectal examination<sup>28</sup>. TPUS is not, however, recognised as a reference method  
108 for OASI detection.

109 Driven by the clinical need, the challenge of inventing and developing a novel device  
110 to detect anal sphincter injuries utilising electric impedance spectroscopy technique  
111 was taken up as the latter is an established physical marker of biostructure/tissue  
112 condition<sup>29-30</sup>, already successfully used in other medical domains<sup>31-34</sup>. With this  
113 technique, a sinusoidal electrical current, below the sensation threshold, is locally  
114 applied to the human body at different frequencies and the voltage response is  
115 measured from which impedance is calculated. So far, to the authors' knowledge,  
116 there has been no experience with utilising this technique for diagnostics of the  
117 perianal area. An investigator-initiated proof-of-concept research study with 22  
118 patients, followed by two pilot clinical studies with prototype devices (see below) in a  
119 total of 69 post-partum women, have been completed and previously reported  
120 wherein the method validity was demonstrated<sup>35-38</sup>. However, it was found out that  
121 due to subtlety of differences in raw impedance parameters between normal (non-  
122 injured) and injured tissue structures, clinically useful sensitivity and specificity could  
123 only be achieved by utilising nonlinear machine learning (ML) algorithms for ultimate  
124 test outcome interpretation. Prototypes of such device, called the ONIRY system,  
125 with the ML module gradually trained with the clinical data collected, were designed  
126 and developed<sup>35-36</sup>. The overall concept for this system was to serve as a rapid  
127 detection method for OASI that could be applied immediately after delivery.  
128 This clinical study was aimed at evaluating clinical performance and safety of the  
129 ONIRY system for rapid detection of OASI versus EAUS as the reference diagnostic  
130 method following re-training of the ML model with data from a larger, balanced (with  
131 and without OASI) population of post-partum women.

132

133

## 134 **2. Materials and Methods**

135

136 A prospective, comparative, multicenter, international clinical study was designed,  
137 composed of two parts: the clinical conduct (Part I) and modelling and ML (Part II).  
138 Part I of the study was conducted from 2021 to 2022 at five European centers in  
139 Czech Republic, Slovakia, Poland, and Spain. The study design and conduct were in  
140 line with the Good Clinical Practice guidelines for medical device studies (ISO  
141 14155:2020). All approvals by the national regulatory authorities as well as positive  
142 opinions by the ethics committees, per local regulations, were obtained prior to study

143 initiation. Written informed consent was collected from each study participant before  
144 enrolment. The study was registered at ClinicalTrials.gov under NCT04903977.

145

## 146 **Study design**

147 The study was designed to enroll a total of approximately 150 women between 18  
148 and 49 years old, primiparous, or multiparous, from the first moments up to 8 weeks  
149 after vaginal (spontaneous or assisted) delivery of a singleton, live fetus, in any  
150 presentation, in gestational week 34 or higher. All inclusion and exclusion criteria are  
151 listed in **Supplementary File S1**, along with the detailed study plan.

152 Three study groups were pre-defined, with fixed numbers of participants enrolled as  
153 to ensure generation of balanced data from women with and without OASI.  
154 Participants were initially enrolled in these groups based on the evaluation made  
155 immediately after delivery according to the 4-degree perineal tears scale<sup>39</sup>:  
156 approximately 30 women were planned for group A (no visible perineal tear),  
157 approximately 60 for group B (clinically detectable first- or second-degree perineal  
158 tear, including episiotomy), and approximately 60 for group C (clinically detectable  
159 third- or fourth-degree perineal tear, affecting anal sphincters, regardless of primary  
160 repair).

161 The study duration for each participant was from 2 days up to 5 weeks and included  
162 3 study visits. At the first visit, performed from the first moments up to 8 weeks after  
163 delivery, collection of medical history, including pregnancies and births, a physical  
164 examination, including proctological and gynaecological assessment, a 12-lead  
165 electrocardiogram (ECG) recording, and clinical signs of FI using the Wexner score  
166 were carried out. At the same visit, three-dimensional (3-D) EAUS, used as the  
167 reference diagnostic method and a tool for the ultimate study group allocation, was  
168 performed. Following such allocation (per EAUS-based OASIS classification<sup>40-41</sup>), the  
169 impedance spectroscopy by ONIRY system was performed at the second study visit  
170 (on the same day as the first study visit of up to 7 days after it). A web-based  
171 application was utilised for providing the preliminary test interpretation (only to give  
172 the operator an experience of getting the ONIRY examination result of OASI detected  
173 or not detected); since this interpretation was generated based on the ML model  
174 trained on data from the previous, small pilot clinical studies, it could differ from the  
175 ultimate interpretation obtained using the ultimate ML model trained within Part II of  
176 this study. For the exploratory analysis of reproducibility of impedance

177 measurements, two consecutive measurement runs were performed per patient and  
178 an arbitrary criterion for discrepancy was applied, i.e., a difference between the first  
179 and second measurement runs greater than 1 k $\Omega$  for the frequency equal to 1 kHz.

180 A 12-lead ECG was repeated immediately after impedance measurement with  
181 ONIRY system.

182 Faecal calprotectin levels were also measured as to assess any correlation with the  
183 results of tissue electrical impedance. At the third study visit, from 0 up to 28 days  
184 after the second visit, anal sphincter function was evaluated using a high-resolution  
185 anorectal manometry (an optional procedure, subject to actual availability at the  
186 given study site). Vital signs were assessed at each study visit.

187 No blinding of the study was deemed feasible. However, it was not considered as  
188 required for securing objectivity of the study outcomes as the preliminary  
189 interpretation of the impedance measurement displayed by the ONIRY system  
190 immediately after the impedance measurement (generated based on the ML model  
191 established from the previous, small pilot clinical studies) was independent from the  
192 test operator and thus not impacted by the EAUS result knowledge at study entry.  
193 Furthermore, as to minimise any bias related to the EAUS evaluation as the primary  
194 reference method, a specific technical control measure was in place that allowed for  
195 performance of the ONIRY examination only after the EAUS result and interpretation  
196 were fixed (entered in the electronic Case Report Form).

197

198 Study endpoints

199 The diagnostic outcome of ONIRY examination versus 3-D EAUS assessed per the  
200 OASIS classification was set as primary endpoint and used for the conclusion on the  
201 diagnostic performance of the ONIRY system (following the application of the ML  
202 algorithms re-trained in Part II of the study).

203 For the EAUS-based Diagnostic Outcome, OASI was considered detected as long as  
204 any depth, length, or circumference range of either anal sphincter (external or  
205 internal) was captured (score >2 by OASIS classification).

206 For the exploratory analysis of reproducibility of impedance measurements, the  
207 discrepancies were considered significant if the impedance difference between the  
208 first and second ONIRY measurement runs were greater than 1 k $\Omega$  for the frequency  
209 equal to 1 kHz.

210 Results obtained for secondary endpoints related to diagnostic performance  
211 assessed in this study, i.e., the Diagnostic Outcomes with other diagnostic measures  
212 utilised as reference methods for construction of the respective ML models, i.e., the  
213 digital rectal examination and high-resolution anorectal manometry, are not included  
214 in this report.

215 Adverse Events (AE) were recorded in each participant from enrolment to the last  
216 study visit.

217

### 218 **ONIRY system**

219 The impedance spectroscopy examination was performed in each study participant  
220 using the ONIRY system composed of 3 elements: the impedance spectrometer, the  
221 anal probe (ONIRY Probe), and the ML module. The spectrometer generates the  
222 sinusoidal application current in the frequency range of 1-100 kHz with an amplitude  
223 below the threshold of sensation and pain.

224 The ONIRY Probe, made of a biocompatible, rigid, plastic material, has a diameter of  
225 12 mm (at the electrodes site; the head has a diameter of 19 mm at the highest), and  
226 is composed of 8 stainless steel electrodes allowing for the measurement of the  
227 impedance module, phase shift, resistance, and reactance in perianal area. The  
228 ONIRY Probe has a handle with a marker indicating the position to be placed in the  
229 anal canal (see Figure 1).

230 The ONIRY Probe is inserted into the anal canal for approximately 1 minute. It should  
231 not be rotated or moved during the measurement. The examination is carried out in  
232 supine position (or in the patient lying on her left side with knees flexed, as per  
233 operator preference) as presented in Figure 2.

234 Based on raw electric impedance data collected by the anal probe and read by the  
235 ONIRY Spectrometer, the statistical parameters for the frequency sub-compartments  
236 are determined and used as the input vector for the ML model. Following the  
237 impedance measurement, with such ML support, the ONIRY system determines  
238 whether the patient has OASI and returns “PASS” (no OASI detected) or “REFER”  
239 (OASI detected). The algorithm also prevents from conducting the measurements in  
240 case abnormal use of the ONIRY Probe is detected (impedance data compatible with  
241 an improper insertion in the anal canal or no insertion at all).

242

### 243 **Endoanal ultrasound**

244 The imaging of the external and internal anal sphincters, as well as the puborectalis  
245 muscle, was performed. The 3-D EAUS examination conditions were standardized (a  
246 study-specific EAUS manual was implemented at all study centres). The 3-D EAUS  
247 findings were interpreted according to the OASIS classification<sup>41-42</sup> for the primary  
248 endpoint. In order to evaluate if evaluation according to other semiquantitative scores  
249 established for EAUS, the Starck scale<sup>42</sup> or the Norderval scale<sup>43</sup>, could positively  
250 impact the diagnostic performance of ONIRY system once such scores are used  
251 instead of OASIS classification, each EAUS examination was additionally rated by its  
252 operator using these two scores (and respective ML models were constructed for  
253 further evaluation within exploratory analyses).

254

### 255 **Statistical analysis**

256 For calculation of diagnostic performance metrics for ONIRY, the Diagnostic  
257 Outcome was determined separately for each performance endpoint, as:

- 258 1. Diagnostic Success: presence (True Positive) or absence (True Negative) of  
259 OASI consistently detected by the ONIRY examination and the reference  
260 diagnostic method, or
- 261 2. Diagnostic Failure: mismatch (False Positive or False Negative) of the OASI  
262 detection by the ONIRY examination and the reference diagnostic method, or
- 263 3. Diagnostic Indeterminate: no ONIRY or reference diagnostic method result  
264 available or interpretable.

265 For the primary endpoint, 3-D EAUS result (by OASIS classification) served as the  
266 reference method. Evaluation of the exploratory endpoints (diagnostic outcome with  
267 3-D EAUS evaluated with Norderval<sup>44</sup> or Starck<sup>43</sup> scales) was performed accordingly.  
268 Accuracies were defined as Diagnostic Successes/Total, sensitivities as True  
269 Positives/(True positives + False Negatives), and specificities as True  
270 Negatives/(True Negatives + False Positives). Also, the F1 score, and Matthew's  
271 Correlation Coefficient (MCC)<sup>44</sup> were calculated.

272 The safety profile of ONIRY system was evaluated using descriptive statistics.

273

### 274 **Data analysis (Part I) and Machine Learning modelling (Part II)**

275 Details for the algorithm utilised for interpretation of the ONIRY examination results  
276 presented by ONIRY in Part I of the study, with the preliminary ML model based on



277 data from the two previously completed pilot clinical studies, are included in  
278 **Supplementary File S2.**

279 Details of the *in silico* analyses conducted within Part II of the study, with exploratory  
280 data analysis dimensionality reduction, ML modelling, and ultimate performance  
281 analysis with 10-fold cross-validations, are included in **Supplementary File S3.**

282 Within the per-patient reproducibility analysis, in case of a significant discrepancy  
283 between the two ONIRY measurement runs recorded from the same participant, the  
284 second measurement run was removed from the analysis dataset for the final  
285 algorithm for the ONIRY system (of note, in the real-world use, just one ONIRY  
286 measurement run will be conducted).

287

### 288 **3. Results**

289

#### 290 **Study population**

291 One hundred fifty-three participants were screened and 152 enrolled (1 screening  
292 failure). Following performance of the 3-D EAUS with OASIS classification, the  
293 ultimate allocation was: 30 in group A (no visible perineal tear and no OASI), 61 in  
294 group B (clinically detectable first- or second-degree perineal tear but no OASI), and  
295 61 in group C (clinically detectable third- or fourth-degree perineal tear with OASI).

296 The key characteristics of the study population, per study group and in total, are  
297 presented in Table 1.

298 Fifteen participants prematurely discontinued the study: 3 (10.0% (3/10)) in group A,  
299 10 (16.4% (10/61)) in group B, and 2 (3.3% (2/61)) in group C; all discontinuations  
300 occurred between the second and last visits.

301

#### 302 **Part I (Clinical conduct)**

303 All participants enrolled were evaluable for the primary endpoint as well as safety.  
304 Diagnostic Success or Failure could be determined for 147 participants for the  
305 primary endpoint. For the remaining 5 participants (enrolled at 3 clinical sites), the  
306 Diagnostic Outcome was Indeterminate due to electric impedance measurements  
307 highly outlying from the measurement range of the ONIRY Spectrometer, not  
308 corresponding with the impedance of the tissues measured in the anal canal.  
309 Consequently, the Diagnostic Success or Failure were assessable for 60 participants

310 with OASI (group C) and 87 participants with no OASI (groups A and B) for the  
311 primary endpoint.

312 Using the limited ML model trained based on data from previous small (pilot) clinical  
313 studies with ONIRY, the diagnostic performance metrics were of 66.7% for  
314 sensitivity, 57.5% for specificity, 61.2% for accuracy, 0.58 for F1 score, and 0.24 for  
315 MCC (see **Supplementary File S4** for details).

316 No significant correlations between faecal calprotectin levels and results of EAUS or  
317 ONIRY examinations were found.

318

### 319 **Part II (*In silico* Machine Learning modelling)**

320 The ultimate performance analysis was performed using the ML model trained with  
321 data generated in Part I of this study (raw electric impedance data by ONIRY and  
322 data on OASI detection by EAUS as the reference). A total of 298 impedance  
323 measurements (meeting quality requirements, see **Supplementary File S5**) were  
324 included, i.e., 122 corresponding with OASI (group C participants) and 176 with no  
325 OASI (group A and B participants). Following the exploratory data analysis,  
326 dimensionality reduction, and modelling with the artificial neural networks, markedly  
327 improved diagnostic metrics (with sensitivity slightly above 90% and specificity  
328 slightly below 85%) were observed, as presented in Table 2 (see **Supplementary**  
329 **File S6** for individual statistics for each single 10-fold cross-validation).

330 The exploratory analysis of per-patient reproducibility of impedance measurements  
331 recorded in Part I of the study showed discrepancies between the two impedance  
332 measurement runs in 19 participants (12.8%).

333 The exploratory analysis of performance assessment in reference to 3-D EAUS with  
334 the use of the classifications of anal sphincter injuries according to Starck<sup>43</sup> and  
335 Norderval<sup>44</sup>(also utilised to train alternative artificial network ML models, respectively)  
336 resulted in 83.8 % for sensitivity, 88.1 % for specificity, 86.4 % for accuracy, 0.83 for  
337 F1 score, and 0.73 for MCC for Starck scoring and 84.3 % for sensitivity, 89.3 % for  
338 specificity, 87.4 % for accuracy, 0.84 for F1 score, and 0.74 for MCC for Norderval  
339 scoring.

340

### 341 **Safety results**

342 No deaths, serious AEs, or AEs leading to premature withdrawal from the study were  
343 reported during the study conduct. A total of 22 AEs were observed in 21 participants

344 (4 AEs in group A, 5 in group B, and 13 in group C); all these AEs were reported  
345 posteriorly to the ONIRY examinations. Four AEs occurred more than in one  
346 participant, of which the most frequent were nasopharyngitis (2.6%, 4/152) and  
347 COVID-19 (2.6%, 4/152).

348 No AE was considered related to the use of the ONIRY system (i.e., no adverse  
349 device effect was reported).

350 No trend was observed in ECG for any parameter when comparing the baseline  
351 (recordings prior to the ONIRY examination) with post-ONIRY application recordings.

352 No post-ONIRY application clinically significant abnormality recorded as an AE within  
353 the cardiovascular system, either.

354

### 355 **Post-hoc analysis**

356 Following the exploratory analyses of per-patient reproducibility of impedance  
357 measurements 19 measurement files (those generated from the second  
358 measurement in each case) were eliminated for the production version of the ultimate  
359 ML model for the ONIRY system, leaving 93.6% (279/298) of the dataset for the  
360 analysis (“limited dataset”). The limited dataset included 279 impedance  
361 measurements, i.e., 117 corresponding with OASI and 162 with no OASI. A post-hoc  
362 performance analysis with cross-validations performed for this ML model showed the  
363 diagnostic metrics with either sensitivity and specificity of ONIRY system at 90.0%,  
364 as presented in Table 3 (see **Supplementary File S6** for individual statistics for each  
365 single 10-fold cross-validation).

366

## 367 **4. Discussion**

368

### 369 **Key Findings**

370 The ONIRY system showed high diagnostic performance in detection of OASI versus  
371 EAUS results as the reference method (per OASIS classification) in the study  
372 population of women after vaginal delivery, enriched for the cases with OASI (40.1%,  
373 61/152 of all women enrolled). As a result of Part II of the study, following the *in silico*  
374 ML model re-training with the data generated in Part I of the study, an accuracy of  
375  $87.0 \pm 0.5\%$ , sensitivity of  $90.6 \pm 2.0\%$ , and specificity of  $84.6\% \pm 1.9\%$  were  
376 observed for ONIRY. After limiting the dataset (by 6.4%, 19/298) based on the  
377 discrepancies in the consecutive impedance measurements, the next ML model, to

378 be utilised for the final ONIRY system, reached an accuracy of  $90.0 \pm 0.4\%$ , with a  
379 sensitivity of  $90.0 \pm 1.2\%$  and a specificity of  $90.0 \pm 0.7\%$ . This demonstrates the  
380 diagnostic benefit of the ML support for analysis of electric impedance data for OASI  
381 detection achieved thanks to re-training the ML model (models) with a relatively large  
382 and well-balanced (OASI vs. no OASI) dataset. This is in contrast with the  
383 intermediary moderate performance (accuracy of 61.2%) of the ML-assisted  
384 impedance spectroscopy method observed in Part I of the study for the same setting  
385 (same diagnostic reference method and study participants) but utilising the ML model  
386 constructed solely with the data from the smaller (pilot), poorly balanced (OASI cases  
387 underrepresented) previous clinical studies. The performance improvement of the  
388 ultimate ML model constructed for the ONIRY system appears to be due to a higher  
389 variability of raw impedance data collected in this clinical study compared with the  
390 data from the previous (pilot) clinical studies with ONIRY as well as the dataset  
391 balance (OASI cases highly represented).

392 The alternative performance metrics obtained when utilising the exploratory  
393 reference methods (OASI evaluated by EAUS using Starck and Norderval scores,  
394 including alternative ML models constructed) did not demonstrate apparent benefits  
395 over the primary performance measure as presented above.

396 No safety concern has been identified with the use of the ONIRY system.

397

### 398 **Clinical Implications**

399 Currently, no rapid, easy-to-use, reliable diagnostic tool is available in maternity care  
400 settings that could be used immediately or shortly (within hours) after a vaginal  
401 delivery and operated by all personnel within the obstetric team. As demonstrated in  
402 this study, the ONIRY system, providing a straightforward interpretation of the electric  
403 impedance results in the anal canal, can detect OASI with high accuracy, at a level of  
404 approximately 90% (compared with 3-D EAUS, per OASIS classification, utilised as  
405 the reference method). With such metrics, this method has the potential to be  
406 adopted as a method for detection of OASI effectively complementing the digital  
407 rectal examination, especially where the 3-D EAUS is not or scarcely available for  
408 such primary detection. Since a single measurement run of the ONIRY system  
409 (including the automated analysis and presentation of the results) takes less than a  
410 minute, it may have an acceptance potential for medical (obstetric) practice.

411 As found out by a Cochrane Library systematic review, EAUS performed immediately  
412 after delivery, before any perineal repair, allows for an increase in OASI detection  
413 and thus the primary sphincter repair rate. Also, EAUS completed prior to the  
414 perineal repair may be associated with a reduced risk of developing severe FI<sup>21</sup>. This  
415 observation indicates that obstetricians, frequently having no efficient tool for OASI  
416 detection in their routine practice, may not be able to timely initiate the optimal  
417 treatment. As evidenced in literature, training in perineal anatomy and detection of  
418 pelvic floor injuries is still insufficient among obstetricians and midwives<sup>45-48</sup>.

419 What favours EAUS as the diagnostic method is the possibility to separately visualise  
420 both external and internal anal sphincters. This allows for a targeted repair of the  
421 external or both internal and external sphincter. Anyway, EAUS examination is not  
422 sufficiently available, as a rule, in the obstetric settings. It is one of the main factors  
423 contributing to the underdiagnosis of OASI (missing OASI). Even if the EAUS  
424 advantages are undeniable, this procedure remains challenging from both  
425 operational and economical standpoints, depending primarily on the availability of  
426 experienced operators, as well as equipment. Therefore, there is an unmet need for  
427 establishing an effective, non- or lowly invasive method for OASI detection for  
428 maternity care facilities and midwife practices that have no reliable diagnostic tool in  
429 place. Optimally, such a method should allow for its application as a screening test  
430 with clearly defined criteria for extended diagnostics as required and available. In  
431 case the impedance spectroscopy proves to perform in clinical practice, it might also  
432 help guide the overall postpartum management of women in the maternity care  
433 facilities and streamline early referrals to specialised surgery units.

434 With the ML implemented in the ONIRY system, the raw impedance data is  
435 automatically interpreted, and the ultimate test result presented in a simple binary  
436 (injured/non-injured or pass/refer) form. Such a feature of the ONIRY examination  
437 would presumably enable its routine performance even by an operator with limited  
438 experience.

439 No risks or safety concerns have been identified for the electric impedance-based  
440 method for OASI detection, in particular with the use of the ONIRY system. From the  
441 performance standpoint, the following contraindications for ONIRY examination could  
442 be considered: any implants in the pelvic area, major malformations of the perianal  
443 area, or coincident connection with any electronic medical or surgical equipment or  
444 device generating alternating current above 1 kHz.

445

## 446 **Limitations and research implications**

447 There are several limitations of this study.

448 The study population was specifically selected, i.e., enriched with OASI cases (group  
449 C, n=61). Such imbalance was deemed necessary to improve the internal balance of  
450 the dataset as to increase the robustness of the ML model (models) constructed due  
451 to expectedly higher internal data coherence. In fact, it is a common approach in the  
452 development and training of artificial intelligence/ML tools, applicable not only in the  
453 medical field but also beyond<sup>49</sup>.

454 Moreover, the primary endpoint set was surrogate (OASI detection) and not  
455 ultimately clinically meaningful (which could be the FI or a quality of life-based  
456 endpoint). This surrogate endpoint was set to facilitate a comparison of the ONIRY  
457 system with the 3-D EAUS as the gold diagnostic standard, feasible within a  
458 relatively short time span. Establishing a clinically meaningful benefit for the ONIRY  
459 system would require further long-term follow-up studies spanning rather years than  
460 months or weeks considering the dynamics of FI development over time in women  
461 with OASI. Such putative benefit of rapid detections of OASI would be, however,  
462 highly dependent on the actual therapeutic measures that are feasible and actually  
463 performed in the given obstetric settings. Of paramount importance will be the ability  
464 to quickly perform the primary repair of the anal sphincter in women with OASI  
465 detected, considering the narrow time window for such procedure, up to just 8 to 12  
466 hours following delivery<sup>50-51</sup>.

467 Furthermore, for the majority (52 out of 61) of participants in group C with the  
468 sphincter primary repair made, such repair had been performed prior to enrolment in  
469 the study. This may have altered the impedance spectroscopy readouts towards non-  
470 injured (no OASI) cases. However, since the ML models, particularly the ultimate ML  
471 model, were trained on such data, it can be speculated that the real-world  
472 performance of the ONIRY system in the target population (i.e., prior to performing  
473 the primary repair) would be even greater. This is because the biostructure and  
474 geometry of the anal sphincter muscle injured and newly repaired (primary repair) is  
475 basically closer to normal than for the muscle newly injured and unrepaired (not yet  
476 repaired).

477 This high proportion of OASI cases with primary repair already made prior to ONIRY  
478 (and 3-D EAUS) evaluations corresponds with the difference between the study

479 group characteristics for the time elapsed between the index delivery and ONIRY  
480 examination (median time of 28 days in group C versus 2 and 11 days in groups A  
481 and B, respectively). This imbalance reflects the enrolment difficulty the investigators  
482 and study sites had with enriching the study population with participants with 3<sup>rd</sup> and  
483 4<sup>th</sup> degree perineal tears (i.e., the study group C), and the long diagnostic and  
484 therapeutic pathway currently being experienced by patients with OASI.

485 On the other hand, the inclusion of a considerable proportion of women with OASI  
486 only after the primary repair in group C allows to address, as described in the  
487 literature, clinical situations where under-classified OASIs remain unattended or  
488 ineffectively attended, despite primary repair being performed (incomplete repair)<sup>52,53</sup>.

489 Literature data shows that the primary repair itself is performed ineffectively in over  
490 30% of cases, mainly due to limited experience of the operator but also to the  
491 emergency nature of the repair procedure itself, usually performed during on-call  
492 hours<sup>54</sup>. It is therefore postulated that the classification of cases with the repair made  
493 shortly prior to study enrolment to the 'injured' group is methodologically acceptable.

494 Finally, for multiparous women, no detailed data was captured (in particular, no  
495 active diagnostics was performed) on potential undetected OASIs that would have  
496 possibly occurred at previous delivery/deliveries. In such a case, theoretically, the  
497 impedance parameters might appear normal (as the tissue had likely healed)  
498 whereas EAUS might still show some abnormality. However, an alternative  
499 diagnostic scenario might also be speculated for multiparas: an abnormal impedance  
500 spectroscopy with normal EAUS, compatible with fibrosis following an old injury.

501

## 502 **5. Conclusions**

503

504 This study demonstrated that the ONIRY system utilising ML-assisted impedance  
505 spectroscopy with a dedicated anal probe is a safe and effective method for rapid  
506 detection of OASI in women having given vaginal delivery.

507

## 508 **Disclosure of interests**

509 K.B. is a founder and management board member at OASIS Diagnostics, an author  
510 of the related patent and R&D strategy, independent consultant, and trainer of  
511 Takeda.

512 M.M., M.R., K.K., and P.I. are staff of OASIS Diagnostics.

513 A.S. is an independent consultant of Ethicon, Takeda, Pfizer, Sofar.

514 M.UM. is an independent consultant of Regen Lab.

515 H.H., P.J., M.UM., E.D., and E.GD. received remuneration as a study investigator.

516 H.H., C.R., and A.S. are independent consultants and members of the OASIS

517 Diagnostics' Scientific Advisory Board.

518 Others declare no conflicts of interest.

519

## 520 **Author contributions**

521 Conceptualization: KB, MM, PI

522 Data curation: KB, MM, MR, KK, PI

523 Formal analysis: MM, MR, KK

524 Funding acquisition: KB, MM

525 Investigation: HH, PJ, MUM, ED, EGD

526 Methodology: KB, MM, MR, KK, PI

527 Project administration: KB, MM

528 Resources: HH, PJ, MUM, ED, EGD

529 Software: MM, MR, KK

530 Supervision: KB, MM, PI, CR, AS

531 Validation: MM, PI

532 Visualization: MR, KK

533 Writing - original draft: KB, MM, MR, KK, PI

534 Writing - review & editing: All co-authors

535

## 536 **Details of ethics approval**

537 The study was approved by the ethics committees respective for each study site: on

538 19 March 2021 by Ethics Committee of the Institute for Maternal and Child Care (no.

539 1/19.03.2021), on 27 April 2021 by Ethics Committee for Research with Medicines of

540 the Health Areas of León and Bierzo (no. 2186), on 9 June 2021 by Ethics

541 Committee of the University Hospital of Brno (no. 47/21Zdrav.), on 14 October 2021

542 by Ethics Committee at the Regional Medical Chamber in Warsaw (no. KB/1362/21)

543 and on 25 July 2022 by Ethics Committee at AGEL Hospital Košice-Šaca (no. ONIRY

544 3/2/2020).

545

## 546 **Funding**



547 The study was funded by the European Union as part of the Fast Track program,  
548 conducted in Poland by the National Centre for Research and Development  
549 (POIR.01.00.01-00-0726/18).

550

## 551 **References**

- 552 [1] Sideris M, McCaughey T, Hanrahan JG, Arroyo-Manzano D, Zamora J, Jha S et  
553 al. Risk of obstetric anal sphincter injuries (OASIS) and anal incontinence: a  
554 meta-analysis. *European Journal of Obstetrics & Gynecology and Reproductive*  
555 *Biology* 2020;252,303-312. Doi: 10.1016/j.ejogrb.2020.06.048
- 556 [2] Aigmueller T, Bader W, Beilecke K, Elenskaia K, Frudinger A, Hanzal E et al.  
557 Management of 3rd and 4th degree perineal tears after vaginal birth. *German*  
558 *Guideline of the German Society of Gynecology and Obstetrics (AWMF*  
559 *Registry No. 015/079, October 2014). Geburtshilfe Frauenheilkd*  
560 *2015;75(2):137-44. doi:10.1055/s-0034-1396323*
- 561 [3] Gurol-Urganci I, Cromwell DA, Edozien LC, Mahmood TA, Adams EJ,  
562 Richmond DH et al. Third- and fourth-degree perineal tears among primiparous  
563 women in England between 2000 and 2012: time trends and risk factors. *BJOG*  
564 *2013;120(12):1516-25. doi: 10.1111/1471-0528.12363*
- 565 [4] Dudding TC, Vaizey CJ, Kamm MA. Obstetric anal sphincter injury: incidence,  
566 risk factors, and management. *Ann Surg* 2008;247(2):224-37.  
567 doi:10.1097/SLA.0b013e318142cdf4
- 568 [5] Sultan AH, Kamm MA, Bartram CI, Hudson CN. Anal sphincter trauma during  
569 instrumental delivery. *Int J Gynaecol Obstet* 1993;43:263-70. doi:111/1471-  
570 0528.12363
- 571 [6] Tejedor P, Plaza J, Bodega-Quiroga I, Ortega-López M, García-Olmo D, Pastor  
572 C. The Role of Three-Dimensional Endoanal Ultrasound on Diagnosis and  
573 Classification of Sphincter Defects After Childbirth. *J Surg Res.* 2019;244:382-  
574 388. doi: 10.1016/j.jss.2019.06.080
- 575 [7] Tejedor P, Bodega-Quiroga I, Plaza J, Ortega López M, Gutierrez C, García  
576 Olmo D et al. Quality of life and 3D-EUS assessment for anal incontinence after  
577 childbirth. *Rev Esp Enferm Dig.* 2019;111(6):453-459. doi:  
578 10.17235/reed.2019.6040/2018
- 579 [8] Samarasekera DN, Bekhit MT, Wright Y, Lowndes RH, Stanley KP, Preston JP  
580 et al. Long-term anal continence and quality of life following postpartum anal

- 581 sphincter injury. *Colorectal Dis* 2008;10(8):793–9. doi: 10.1111/j.1463-  
582 1318.2007.01445.x.
- 583 [9] Mous M, Muller SA, de Leeuw JW. Long-term effects of anal sphincter rupture  
584 during vaginal delivery: faecal incontinence and sexual complaints. *BJOG*.  
585 2008;115(2):234–8. doi: 10.1111/j.1471-0528.2007.01502.
- 586 [10] Everist R, Burrell M, Mallitt KA, Parkin K, Patton V, Karantanis E Postpartum  
587 anal incontinence in women with and without obstetric anal sphincter injuries.  
588 *Int Urogynecol J*. 2020 Nov;31(11):2269-2275. doi: 10.1007/s00192-020-04267-  
589 8. Epub 2020 Mar 10.
- 590 [11] Jangö H, Langhoff-Roos J, Rosthøj S, Sakse A Recurrent obstetric anal  
591 sphincter injury and the risk of long-term anal incontinence *Am J Obstet*  
592 *Gynecol*. 2017 Jun;216(6):610.e1-610.e8. doi: 10.1016/j.ajog.2017.02.010.  
593 Epub 2017 Feb 13.
- 594 [12] Guzmán Rojas RA, Salvesen K Å, Volløyhaug I. Anal sphincter defects and  
595 fecal incontinence 15–24 years after first delivery: a cross-sectional study.  
596 *Ultrasound Obstet Gynecol* 2018; 51(5): 677-683. doi: 10.1002/uog.18827
- 597 [13] Meyer I, Richter HE. Impact of fecal incontinence and its treatment on quality of  
598 life in women. *Women's Health (London)*, 2015; 11(2): 225-238. doi:  
599 10.2217/WHE.14.66
- 600 [14] Jangö H, Langhoff-Roos J, Rosthøj S, et al. Wexner score and quality of life in  
601 women with obstetric anal sphincter injury. *International Urogynecology Journal*,  
602 2020; 31(6): 1115-1121. doi: 10.1007/s00192-019-04134-1
- 603 [15] Zimmo K, Laine K, Vikanes Å, Fosse E, Zimmo M, Ali H et al. Diagnosis and  
604 repair of perineal injuries: knowledge before and after expert training-a  
605 multicentre observational study among Palestinian physicians and midwives.  
606 *BMJ Open*. 2017;7(4):e014183. doi: 10.1136/bmjopen-2016-014183.
- 607 [16] Andrews V, Thakar R, Sultan AH. Outcome of obstetric anal sphincter injuries  
608 (OASIS)-role of structured management. *Int Urogynecol J Pelvic Floor Dysfunct*  
609 2009;20(8):973-8. doi: 10.1007/s00192-009-0883-0.
- 610 [17] Ramage L, Yen C, Qiu S, Simillis C, Kontovounisios C, Tan E, Tekkis P. Does a  
611 missed obstetric anal sphincter injury at time of delivery affect short-term  
612 functional outcome? *Ann R Coll Surg Engl*. 2018;100(1):26–32.

- 613 [18] Turel FD, Langer S, Shek KL, Dietz HP. Medium- to Long-term Follow-up of  
614 Obstetric Anal Sphincter Injury. *Dis Colon Rectum* 2019;62(3):348-356.  
615 doi:10.1097/DCR.0000000000001297.
- 616 [19] Nilsson IE, Åkervall S, Molin M, Milsom I, Gyhagen M. Symptoms of fecal  
617 incontinence two decades after no, one, or two obstetrical anal sphincter  
618 injuries. *American Journal of Obstetrics and Gynecology*, 2021;224(3), 276-e1.
- 619 [20] Albuquerque A. Endoanal ultrasonography in fecal incontinence: Current and  
620 future perspectives. *World J Gastrointest Endosc* 2015;7(6):575-581. doi:  
621 10.4253/wjge.v7.i6.575.
- 622 [21] Walsh KA and Grivell RM. Use of endoanal ultrasound for reducing the risk of  
623 complications related to anal sphincter injury after vaginal birth. *Cochrane*  
624 *Database of Systematic Reviews* 2015;(10):CD010826. doi:  
625 10.1002/14651858.CD010826.pub2
- 626 [22] Dietz HP. Exoanal imaging of the anal sphincters; *J Ultrasound Med*;  
627 2018;37(1):263-280. doi: 10.1002/jum.14246
- 628 [23] Sioutis D, Thakar R, Sultan AH. Overdiagnosis and rising rate of obstetric anal  
629 sphincter injuries (OASIS): time for reappraisal. *Ultrasound Obstet Gynecol*  
630 2017;50:642-647. doi: 10.1002/uog.17306
- 631 [24] Thomas GP, Gould LE, Casunuran F, Kumar DA. A retrospective review of  
632 1495 patients with obstetric anal sphincter injuries referred for assessment of  
633 function and endoanal ultrasonography. *Int J Colorectal Dis.* 2017  
634 Sep;32(9):1321-1325. doi: 10.1007/s00384-017-2851-3.
- 635 [25] Stuart A, Ignell C, Örnö AC. Comparison of transperineal and endoanal  
636 ultrasound in detecting residual obstetric anal sphincter injury. *Acta Obstet*  
637 *Gynecol Scand.* 2019;98(12):1624-1631. doi: 10.1111/aogs.13701.
- 638 [26] Ros C, Martínez-Franco E, Wozniak MM, Cassado J, Santoro GA, Elías N,  
639 López M, Palacio M, Wiczorek AP, Espuña-Pons M. Postpartum two- and  
640 three-dimensional ultrasound evaluation of anal sphincter complex in women  
641 with obstetric anal sphincter injury. *Comparative Study Ultrasound Obstet*  
642 *Gynecol.* 2017 Apr;49(4):508-514. doi: 10.1002/uog.15924.
- 643 [27] Ignell C, Örnö AK, Stuart A Correlations of obstetric anal sphincter injury  
644 (OASIS) grade, specific symptoms of anal incontinence, and measurements by  
645 endoanal and transperineal ultrasound. *J Ultrasound* 2021;24(3):261-267. doi:  
646 10.1007/s40477-020-00485-4.

- 647 [28] Wong KW, Thakar R, Sultan AH, Andrews V. Can transperineal ultrasound  
648 improve the diagnosis of obstetric anal sphincter injuries? *Int Urogynecol J.*  
649 2022 Aug 2. doi: 10.1007/s00192-022-05290-7.
- 650 [29] Shiffman CA, Aaron R. Low-impedance localized measurements using standard  
651 bioelectrical impedance analysis instruments. *Ann NY Acad Sci* 2000;904:214–  
652 217. doi: 10.1111/j.1749-6632.2000.tb06453.x
- 653 [30] Aaron R, Shiffman CA. Using localized impedance measurements to study  
654 muscle changes in injury and disease. *Ann NY Acad Sci* 2000;904:171–180.  
655 doi: 10.1111/j.1749-6632.2000.tb06443.x
- 656 [31] Seward B, Rutkove MD, Aaron R, Shiffman CA. Localized bioimpedance  
657 analysis in the evaluation of neuromuscular disease. *Muscle Nerve*  
658 2002;25:390–397. doi: 10.1002/mus.10048
- 659 [32] Młyńczak M, Cybulski G. Decomposition of the cardiac and respiratory  
660 components from impedance pneumography signals. *Proc. of the 10th Int. Joint*  
661 *Conf. on Biomedical Engineering Systems and Technologies – Biodevices*  
662 2017;4:26-33. doi: 10.5220/0006107200260033
- 663 [33] Kushner RF, Schoeller DA. Estimation of total body water by bioelectrical  
664 impedance analysis. *Am J Clin Nutr* 1986;44(3):417-424. doi:  
665 10.1093/ajcn/44.3.417
- 666 [34] Tidy JA, Brown BH, Healey TJ, Daayana S, Martin M, Prendiville W et al.  
667 Accuracy of detection of high-grade cervical intraepithelial neoplasia using  
668 electrical impedance spectroscopy with colposcopy. *BJOG* 2013;120(4):400-10;  
669 discussion 410-1. doi: 10.1111/1471-0528.12096
- 670 [35] Młyńczak M, Borycka-Kiciak K, Uchman-Musielak M, Dziki A. Impedance  
671 Spectroscopy Method to Detect Pelvic Floor Muscle Damage - A Feasibility  
672 Study. In: *World Congress on Medical Physics and Biomedical Engineering,*  
673 *Springer, Singapore, 2018;875–878.* doi: 10.1007/978-981-10-9038-7\_161.
- 674 [36] Borycka-Kiciak K, Młyńczak M, Kiciak A, Pietrzak P, Dziki A. Non-invasive  
675 obstetric anal sphincter injury diagnostics using impedance spectroscopy.  
676 *Scientific Reports* 2019;9(7097):1–9. doi: 10.1038/s41598-019-43637-1.
- 677 [37] Młyńczak M, Rosoł M, Spinelli A, Dziki A, Wlzlak E, Surkont G, et al. Obstetric  
678 Anal Sphincter Injury Detection Using Impedance Spectroscopy with the ONIRY  
679 Probe; *Appl Sci.*; 2021; 11: 637; doi: 10.3390/app11020637.

- 680 [38] Borycka K, Młyńczak M, Rosoł M, Iwanowski P, Uchman-Musielak M, Mik M,  
681 Sudoł-Szopińska I, Herman H, Ratto C, Dziki A, Właźlak E, Surkont G, Krzycka  
682 M, Pająk P, Spinelli A. Impedance spectroscopy for the diagnosis of obstetric  
683 anal sphincter injuries: the pilot experience; In: 15 Congress of the European  
684 Society of Gynecology, 2023.
- 685 [39] Cunningham FG, Leveno KJ, Bloom SL, Hauth J, Rouse D, Spong C. Williams  
686 obstetrics (23<sup>rd</sup> Edition), 2011. New York: McGraw-Hill Medical.
- 687 [40] The Management of Third- and Fourth-Degree Perineal Tears: a Green-top  
688 Guideline No 29; Royal College of Obstetrician and Gynaecologists, London;  
689 2015
- 690 [41] Prevention and Management of Obstetric Lacerations at Vaginal Delivery.  
691 ACOG Practice Bulletin No. 165: American College of Obstetricians and  
692 Gynecologists' Committee on Practice Bulletins—Obstetrics. *Obstet Gynecol*  
693 2016;128(1):e1-e15. doi: 10.1097/AOG.0000000000001523
- 694 [42] Starck M, Bohe, M, Valentin L. Results of endosonographic imaging of the anal  
695 sphincter 2–7 days after primary repair of third or fourth-degree obstetric  
696 sphincter tears. *Ultrasound Obstet Gynecol.* 2003;22:609–615. doi:  
697 10.1002/uog.920
- 698 [43] Norderval S, Markskog A, Rossaak K, Vonen B. Correlation between anal  
699 sphincter defects and anal incontinence following obstetric sphincter tears:  
700 Assessment using scoring systems for sonographic classification of defects.  
701 *Ultrasound Obstet Gynecol* 2008;31: 78–84. doi: 10.1002/uog.5155
- 702 [44] Chicco D, Jurman G. The advantages of the Matthews correlation coefficient  
703 (MCC) over F1 score and accuracy in binary classification evaluation. *BMC*  
704 *genomics*, 2020;21, 1-13.
- 705 [45] De Meutter L, van Heesewijk AD, van der Woerd-Elting I, de Leeuw JW.  
706 Implementation of a perineal support programme for reduction of the incidence  
707 of obstetric anal sphincter injuries and the effect of non-compliance. *Eur J*  
708 *Obstet Gynecol Reprod Biol* 2018;230:119-123. doi:  
709 10.1016/j.ejogrb.2018.09.021
- 710 [46] New joint initiative to prevent severe tearing during childbirth. Royal College of  
711 Obstetricians & Gynaecologists, Royal College of Midwives: London; 2016.  
712 ([https://www.rcog.org.uk/en/news/rcog-statement-new-joint-initiative-to-prevent-](https://www.rcog.org.uk/en/news/rcog-statement-new-joint-initiative-to-prevent-severe-tearing-during-childbirth/)  
713 [severe-tearing-during-childbirth/](https://www.rcog.org.uk/en/news/rcog-statement-new-joint-initiative-to-prevent-severe-tearing-during-childbirth/)). (Accessed on 25th of January, 2022)

- 714 [47] NMPA Project Team: National Maternity and perinatal audit: Clinical report  
 715 2017. In. Royal College of Obstetricians & Gynaecologists. London: NHS  
 716 Ligation Authority 2017.
- 717 [48] Bidwell P, Thakar R, Sevdalis N, Silverton L, Novis V, Hellyer A et al. A multi-  
 718 centre quality improvement project to reduce the incidence of obstetric anal  
 719 sphincter injury (OASI): study protocol. BMC Pregnancy Childbirth 2018 Aug  
 720 13;18(1):331. doi: 10.1186/s12884-018-1965-0
- 721 [49] Batista GEAPA, Prati RC, Monard MC. A study of the behavior of several  
 722 methods for balancing machine learning training data. ACM SIGKDD  
 723 Explorations Newsletter. 2004;6(1):20-29.  
 724 doi:<https://doi.org/10.1145/1007730.1007735>
- 725 [50] Harvey MA, Pierce M, Walter JE, et al. Obstetrical Anal Sphincter Injuries  
 726 (OASIS): Prevention, Recognition, and Repair. Journal of Obstetrics and  
 727 Gynaecology Canada. 2015;37(12):1131-1148.  
 728 doi:[https://doi.org/10.1016/S1701-2163\(16\)30081-0](https://doi.org/10.1016/S1701-2163(16)30081-0)
- 729 [51] Kropshofer S, T Aigmüller, Beilecke K, et al. Management of Third and Fourth-  
 730 Degree Perineal Tears After Vaginal Birth. Guideline of the DGGG, OEGGG  
 731 and SGGG (S2k-Level, AWMF Registry No. 015/079, December 2020).  
 732 Geburtshilfe Und Frauenheilkunde. 2022;83(02):165-183.  
 733 doi:<https://doi.org/10.1055/a-1933-2647>,
- 734 [52] Roper JC, Thakar R, Sultan AH. Under-classified obstetric anal sphincter  
 735 injuries. Int Urogynecol J. 2022 Jun;33(6):1473-1479. doi: 10.1007/s00192-021-  
 736 05051-y. Epub 2022 Feb 12
- 737 [53] O'Leary BD, Kelly L, Fitzpatrick M, Keane DP.. Underdiagnosis of internal anal  
 738 sphincter trauma following vaginal delivery. Ultrasound Obstet Gynecol. 2023  
 739 Feb;61(2):251-256. doi: 10.1002/uog.26049
- 740 [54] Kirss J, Pinta T, Böckelman C, Victorzon M. Factors predicting a failed primary  
 741 repair of obstetric anal sphincter injury. Acta Obstet Gynecol Scand. 2016  
 742 Sep;95(9):1063-9. doi: 10.1111/aogs.12909. Epub 2016 May 18.

743  
 744

Table 1. Characteristics of the study population.

|                    | Group A | Group B | Group C | Total   |
|--------------------|---------|---------|---------|---------|
|                    | (N=30)  | (N=61)  | (N=61)  | (N=152) |
| <b>Age (years)</b> |         |         |         |         |

|                                                                                        |                  |                  |                  |                  |
|----------------------------------------------------------------------------------------|------------------|------------------|------------------|------------------|
| Mean ± SD                                                                              | 31.3 ± 5.4       | 31.9 ± 4.3       | 30.7 ± 4.6       | 31.3 ± 4.6       |
| Range (Min/Max)                                                                        | 22 (18/40)       | 18 (21/39)       | 20 (22/42)       | 24 (18/42)       |
| <b>Age categorised (n, %)</b>                                                          |                  |                  |                  |                  |
| <26 years                                                                              | 5 (16.7)         | 4 (6.6)          | 7 (11.5)         | 16 (10.5)        |
| 26<35 years                                                                            | 15 (50.0)        | 38 (62.3)        | 41 (67.2)        | 94 (61.8)        |
| ≥35 years                                                                              | 10 (33.3)        | 19 (31.2)        | 13 (21.3)        | 42 (27.6)        |
| <b>Race (n, %)</b>                                                                     |                  |                  |                  |                  |
| Asian                                                                                  | 0 (0.0)          | 1 (1.6)          | 0 (0.0)          | 1 (0.7)          |
| Caucasian                                                                              | 30 (100.0)       | 60 (98.4)        | 61 (100.0)       | 151 (99.3)       |
| <b>Weight (kg)</b>                                                                     |                  |                  |                  |                  |
| Mean ± SD                                                                              | 73.3 ± 12.5      | 70.9 ± 11.4      | 68.1 ± 9.6       | 70.2 ± 11.0      |
| Range (Min/Max)                                                                        | 42 (54/96)       | 56 (49/105)      | 60 (48/108)      | 60 (48/108)      |
| <b>BMI (kg/m<sup>2</sup>)</b>                                                          |                  |                  |                  |                  |
| Mean ± SD                                                                              | 25.8 ± 4.2       | 25.3 ± 3.3       | 24.3 ± 3.4       | 25.0 ± 3.6       |
| Range (Min/Max)                                                                        | 16.2 (18.8/35.0) | 18.9 (17.4/36.3) | 15.6 (17.7/33.3) | 18.9 (17.4/36.3) |
| <b>Number of pregnancies (including the index one) (n)</b>                             |                  |                  |                  |                  |
| Median                                                                                 | 2                | 1                | 1                | 1                |
| Range (Min/Max)                                                                        | 5 (1/6)          | 3 (1/4)          | 3 (1/4)          | 5 (1/6)          |
| Primipara/Multipara                                                                    | 7/23             | 42/19            | 46/15            | 95/57            |
| <b>Risk factors for Obstetric Anal Sphincter Injury from the index delivery (n, %)</b> |                  |                  |                  |                  |
| Prolonged second phase of delivery                                                     | 0 (0.0)          | 6 (9.8)          | 10 (16.4)        | 16 (10.5)        |
| Foetal shoulder dystocia                                                               | 0 (0.0)          | 1 (1.6)          | 0 (0.0)          | 1 (0.7)          |
| Birth weight of the neonate >4kg                                                       | 4 (13.3)         | 5 (8.2)          | 6 (9.8)          | 15 (9.9)         |
| Induction of delivery with oxytocin                                                    | 1 (3.3)          | 14 (23.0)        | 9 (14.8)         | 24 (15.8)        |
| Head circumference of the neonate ≥34 cm                                               | 17 (56.7)        | 39 (63.9)        | 49 (80.3)        | 105 (69.1)       |
| <b>Time between the index delivery and ONIRY examination (days)</b>                    |                  |                  |                  |                  |
| Median                                                                                 | 2                | 11               | 28               | 14               |
| Range (Min/Max)                                                                        | 53 (1/54)        | 58 (0/58)        | 55 (1/56)        | 58 (0/58)        |
| <b>Time between the index delivery and EAUS examination (days)</b>                     |                  |                  |                  |                  |
| Median                                                                                 | 2                | 11               | 28               | 14               |
| Range (Min/Max)                                                                        | 53 (1/54)        | 58 (0/58)        | 55 (1/56)        | 58 (0/58)        |

745 BMI=Body Mass Index; N=number of participants in the population specified; SD = Standard Deviation

746 Percentages are calculated based on the numbers of participants with nonmissing values.

747

748 Table 2. Mean performance metrics of the ONIRY system using the models trained  
749 on data from Part I of the study, in the assessment relative to 3-D Endoanal  
750 Ultrasound and OASIS classification.

|                  | Accuracy [%]      | Sensitivity [%]   | Specificity [%]   | F1                  | MCC                |
|------------------|-------------------|-------------------|-------------------|---------------------|--------------------|
| <b>Mean ± SD</b> | <b>87.0 ± 0.5</b> | <b>90.6 ± 2.0</b> | <b>84.6 ± 1.9</b> | <b>0.85 ± 0.004</b> | <b>0.75 ± 0.01</b> |

751 MCC = Matthew's Correlation Coefficient; SD = Standard Deviation

752

753 Table 3. Mean performance metrics of the ONIRY system using the Machine  
754 Learning model trained based on the limited clinical study dataset in the assessment  
755 relative to 3-D Endoanal Ultrasound and OASIS classification.

|                  | Accuracy [%]      | Sensitivity [%]   | Specificity [%]   | F1                 | MCC                |
|------------------|-------------------|-------------------|-------------------|--------------------|--------------------|
| <b>Mean ± SD</b> | <b>90.0 ± 0.4</b> | <b>90.0 ± 1.2</b> | <b>90.0 ± 0.7</b> | <b>0.88 ± 0.01</b> | <b>0.80 ± 0.01</b> |

756 MCC = Matthew's Correlation Coefficient; SD = Standard Deviation

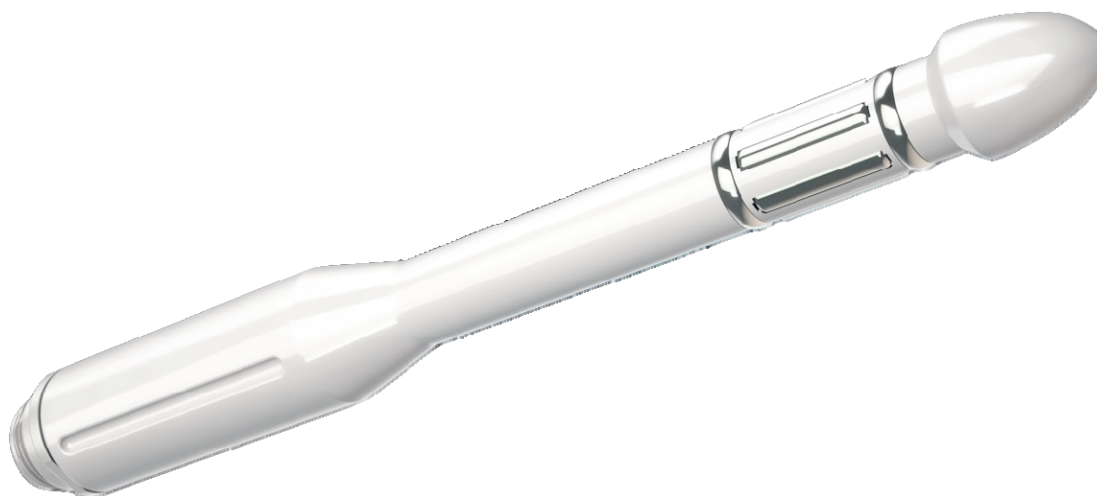

757

758 Figure 1. ONIRY Probe with the marker location.



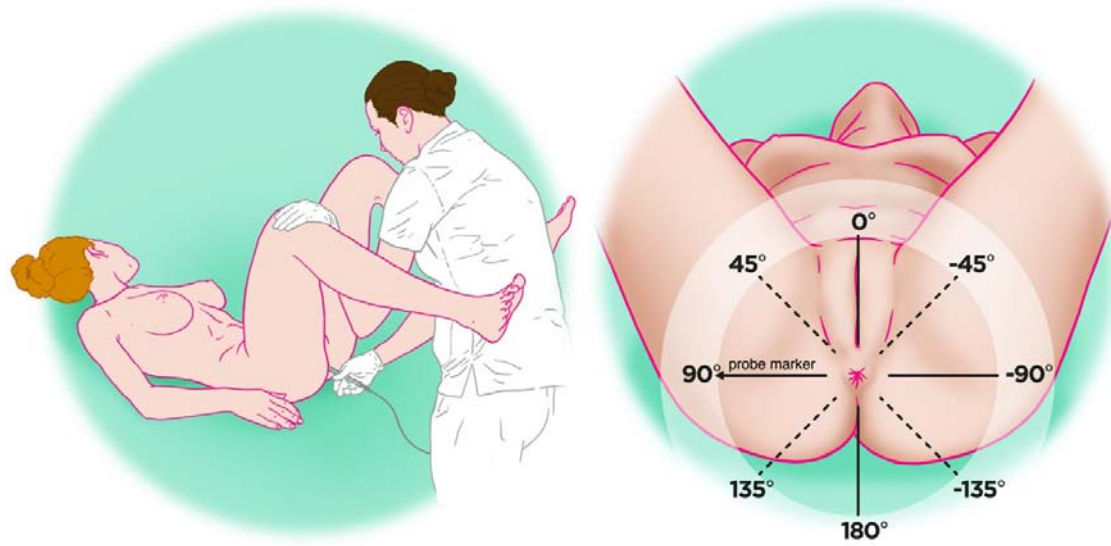

759

760 Figure 2. The participant's position during the ONIRY examination (a) along with  
761 position of the probe marker (b).

762
